# Supplementary material for: Development and Characterization of Integrated Nano-Sensors for Organic Residues and pH Field Detection
Source: MDPI journal article supplement (doi:10.3390/s21175842), 2021-08-30
Supplement: s1 [file s1]

# Development and Characterization of Integrated Nano-Sensors for Organic Residues and pH Field Detection

Itamar Chajanovsky <sup>1</sup>, Sarah Cohen <sup>1</sup>, Giorgi Shtenberg <sup>2</sup> and R. Y. Suckeveriene <sup>1,\*</sup>

<sup>1</sup> Department of Water Industry Engineering, Kinneret Academic College, Zemach 15132, Israel

<sup>2</sup> Institute of Agricultural Engineering, ARO, The Volcani Center, Bet Dagan 7505101, Israel

## 1. FTIR analysis

The Fourier Transform Infrared (FTIR) spectra of the PANI/CNM nanocomposites were in a range of 600 to 4000 cm<sup>-1</sup> obtained on a Thermo 6700 FTIR equipped with a Smart iTR diamond ATR.

**Table S1.** Characteristic FTIR peaks of the DBSA-doped PANI and PANI/MW/P1 samples.

| DBSA-doped PANI                | PANI/MW/P1 | Attribution                                            |
|--------------------------------|------------|--------------------------------------------------------|
| Wavenumber [cm <sup>-1</sup> ] |            |                                                        |
| 3427                           | 3427       | N-H stretching vibration from emeraldine base salt [1] |
|                                | 3204       | O-H stretching (PCL)                                   |
|                                | 2954       | C-H stretching (PCL)                                   |
| 2926                           | 2920       | C-H <sub>2</sub> stretching vibrations (DBSA)          |
| 2857                           | 2851       | C-H <sub>3</sub> stretching vibrations (DBSA)          |
| 1497                           | 1497       | C=C from quinoid rings [2] [3]                         |
| 1460                           | 1454       | C=C from benzenoid rings                               |
| 1417                           | 1408       | C-N stretching in quinonoid-benzenoid [4] [5]          |
| 1394                           | 1377       | C-N stretching in quinonoid-benzenoid                  |
| 1084                           | 1058       | C-H bond deformation vibration (PANI) [6] [2]          |
| 1033                           | 1035       | SO <sub>3</sub> <sup>-</sup> group (DBSA) [1] [2] [7]  |
| 831                            | 829        | C-H out-of-plane deformation vibration (PANI) [8]      |
| 666                            | 666        | S=O stretching (DBSA)                                  |

## 2. TGA analysis

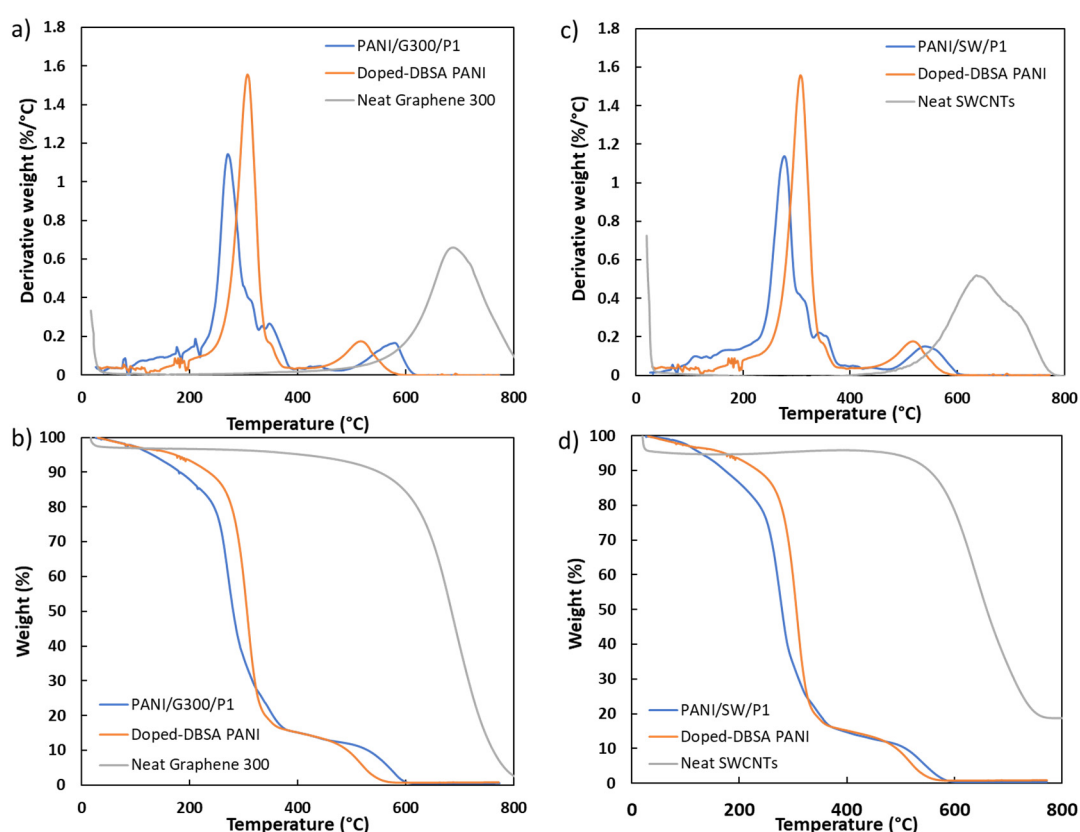

**Figure S1.** DTG (a and c): DTG, and TGA (b and d) thermograms of (Left) PANI/G300/P1 and (Right) PANI/SW/P1.

### 3. Electrochemical measurements

**Table S2.** Summary of the electrical conductivity of the PANI/MW/P1 and PANI/MW/P2 samples in a range of 0.02 – 0.08 wt.% for MWCNTs.

| MWCNT content                  | 0.02 wt.%             | 0.04 wt.%             | 0.08 wt.%             |
|--------------------------------|-----------------------|-----------------------|-----------------------|
| Electrical conductivity [S/cm] |                       |                       |                       |
| 10 wt.% PCL-1                  | $3.23 \times 10^{-4}$ | $3.08 \times 10^{-4}$ | $2.60 \times 10^{-4}$ |
| 10 wt.% PCL-2                  | $3.03 \times 10^{-4}$ | $3.45 \times 10^{-4}$ | $2.11 \times 10^{-4}$ |

### References

- [1] Yadav A, Kumar J, Shahabuddin M, Agarwal A, Saini P. Improved ammonia sensing by solution processed dodecyl benzene sulfonic acid doped polyaniline nanorod networks. *IEEE Access* 2019;7:139571–9. <https://doi.org/10.1109/ACCESS.2019.2942361>.
- [2] Kumar J, Shahabuddin M, Singh A, Singh SP, Saini P, Dhawan SK, et al. Highly sensitive chemo-resistive ammonia sensor based on dodecyl benzene sulfonic acid doped polyaniline thin film. *Sci Adv Mater* 2015;7:518–25. <https://doi.org/10.1166/sam.2015.2000>.
- [3] R. Y. Suckeveriene, E. Zelikman, G. Mechrez, A. Tzur, I. Frisman, Y. Cohen MN. Synthesis of Hybrid Polyaniline/Carbon Nanotube Nanocomposites by Dynamic Interfacial Inverse Emulsion Polymerization Under Sonication. *J Appl Polym Sci* 2010;120:2658–67. <https://doi.org/10.1002/app>.
- [4] Regueira R, Suckeveriene RY, Brook I, Mechrez G, Tchoudakov R, Narkis M. Investigation of the Electro-Mechanical Behavior of Hybrid Polyaniline/Graphene Nanocomposites Fabricated by Dynamic Interfacial Inverse Emulsion Polymerization. *Graphene* 2015;04:7–19. <https://doi.org/10.4236/graphene.2015.41002>.
- [5] Rao PS, Subrahmanya S, Sathyanarayana DN. Inverse emulsion polymerization: A new route for the synthesis of conducting polyaniline. *Synth Met* 2002;128:311–6. [https://doi.org/10.1016/S0379-6779\(02\)00016-4](https://doi.org/10.1016/S0379-6779(02)00016-4).
- [6] Nguyen VH, Lamie C, Kharismadewi D, Tran VC, Shim JJ. Covalently bonded reduced graphene oxide/polyaniline composite for electrochemical sensors and capacitors. *J Electroanal Chem* 2015;758:148–55. <https://doi.org/10.1016/j.jelechem.2015.10.023>.

- [7] Han D, Chu Y, Yang L, Liu Y, Lv Z. Reversed micelle polymerization: A new route for the synthesis of DBSA-polyaniline nanoparticles. *Colloids Surfaces A Physicochem Eng Asp* 2005;259:179–87. <https://doi.org/10.1016/j.colsurfa.2005.02.017>.
- [8] Bachhav SG, Patil DR. Synthesis and Characterization of Polyaniline-Multiwalled Carbon Nanotube Nanocomposites and Its Electrical Percolation Behavior. *Am J Mater Sci* 2015;5:90–5. <https://doi.org/10.5923/j.materials.20150504.03>.
